# Supplementary material
Source: PubMed Central journal article supplement (PMC6965681)
Supplement: BPH-176-4666-s001.pdf [file BPH-176-4666-s001.pdf]

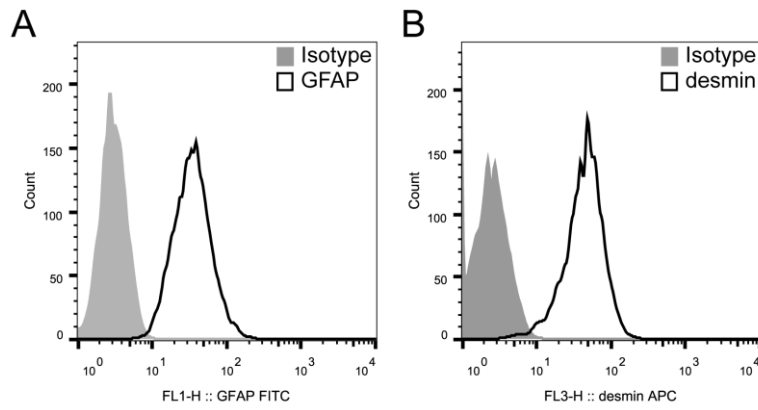

**Figure S1. Detection of HSCs**

(A, B) HSCs were stained for GFAP and intracellular desmin and analysed by flow cytometry.

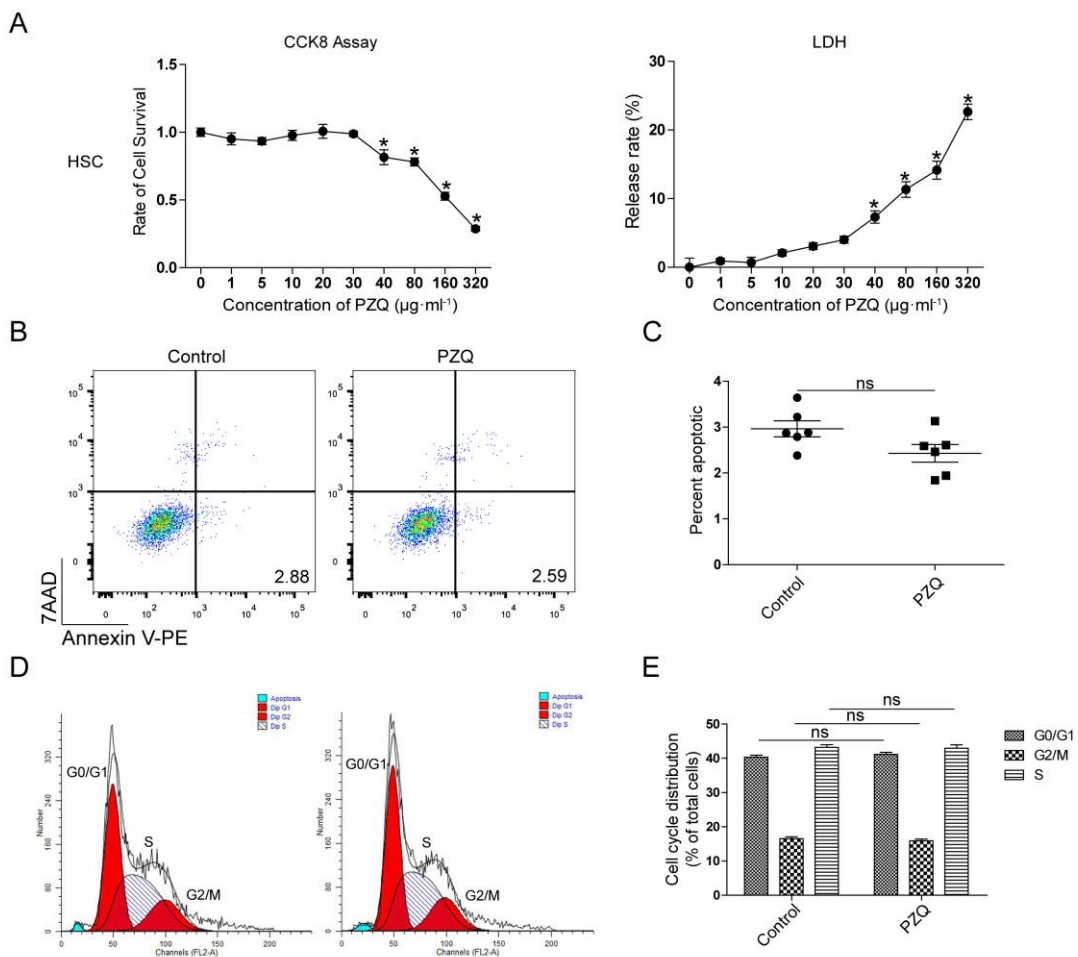

**Figure S2. Cytotoxicity of PZQ in HSCs isolated from healthy mice**

(A) Dose-dependent cytotoxicity of PZQ in HSCs isolated from healthy mice by cell counting kit-8 (CCK-8) and lactate dehydrogenase (LDH) release assays ( $n = 6$ ). (B) HSCs were purified from the healthy mice with or without PZQ ( $300 \text{ mg kg}^{-1} \cdot 12$

hours<sup>-1</sup>) treatment for 4 weeks. The rate of apoptosis was evaluated by flow cytometry. The cells in early apoptosis (Annexin<sup>+</sup><sub>7</sub>/AAD<sup>-</sup>) are in the lower right quadrant. (C) Quantification of apoptotic rate in HSCs (n = 6). (D) The cell cycle distribution of HSCs was assessed by flow cytometry. (E) Quantification of the cell cycle distribution in HSCs (n = 6). All data are presented means ± SEM. \* *P* < 0.05, <sup>ns</sup> *P* > 0.05.

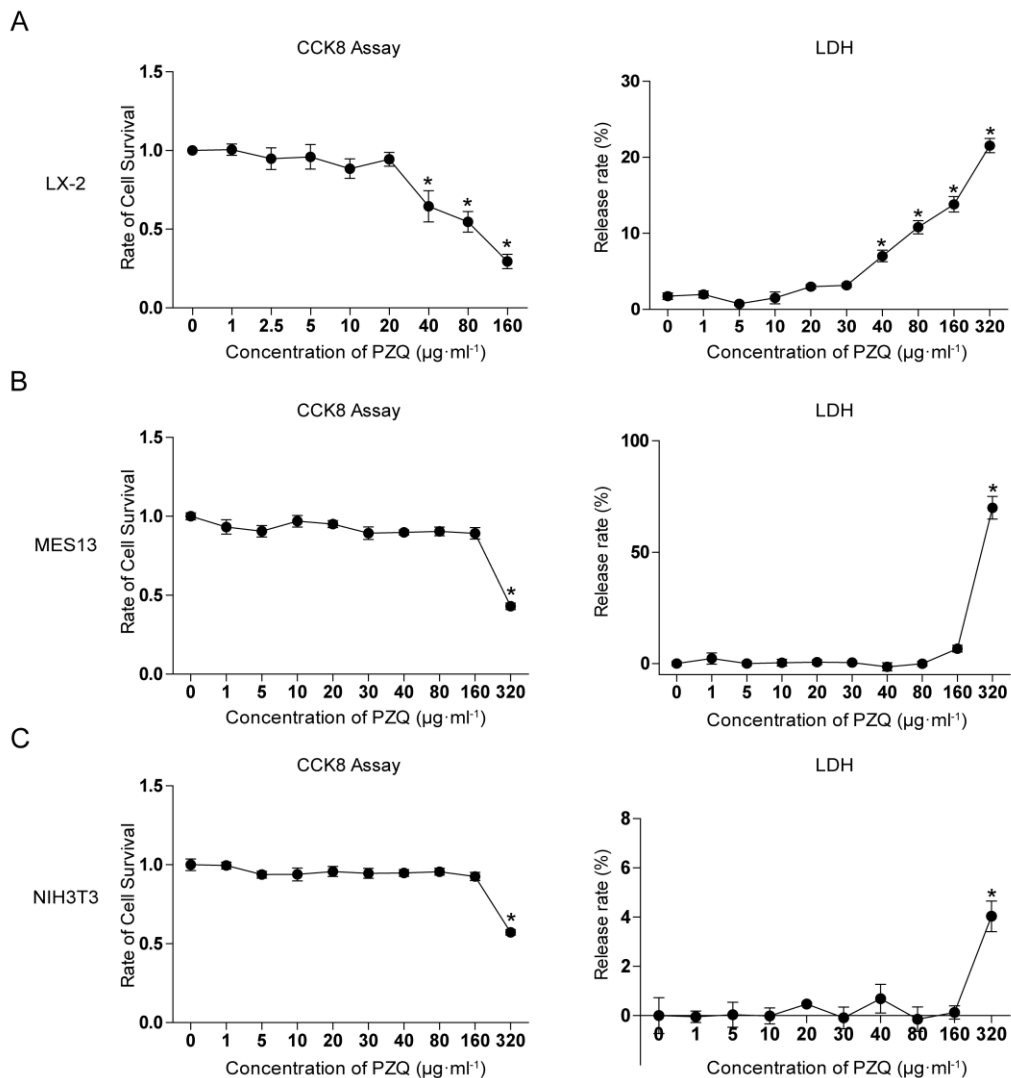

**Figure S3. Dose curve to determine the safe dose of PZQ in LX-2, MES13 and NIH3T3 cells.**

(A, B, C) Dose-dependent cytotoxicity of PZQ in LX-2, MES13 and NIH3T3 cells by cell counting kit-8 (CCK-8) and lactate dehydrogenase (LDH) release assays (n = 6). All data are presented as means ± SEM. \* *P* < 0.05.

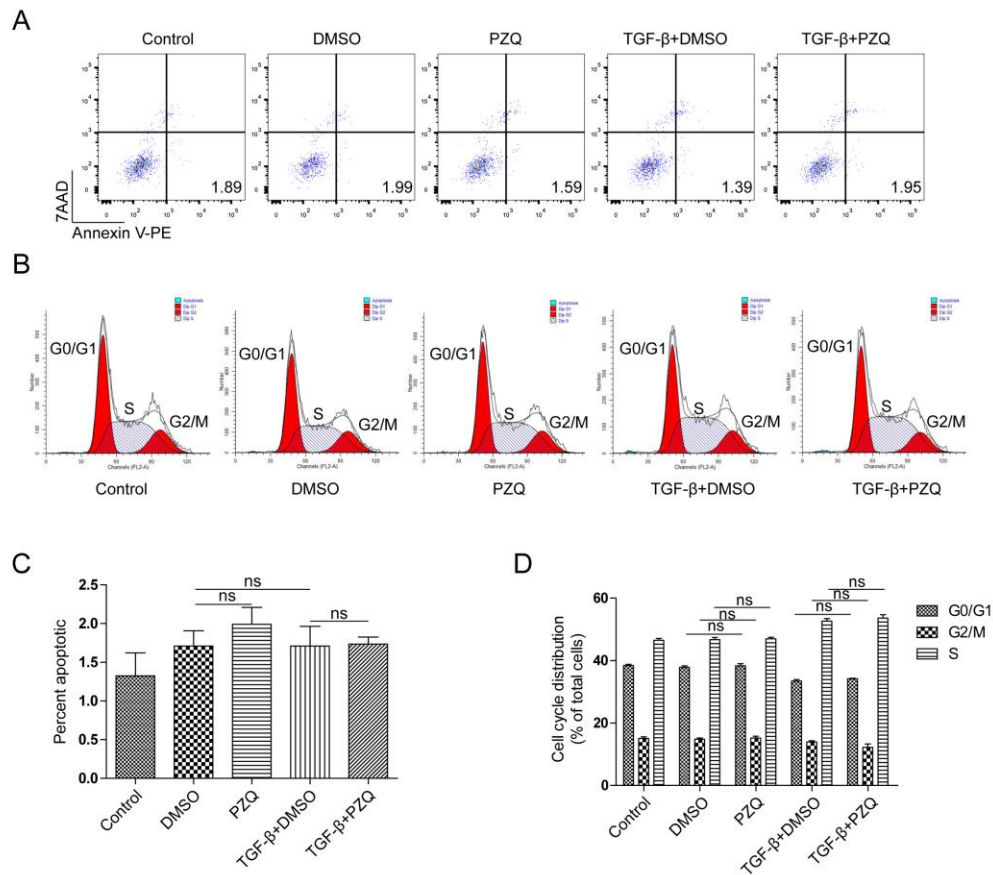

**Figure S4. PZQ does not induce apoptosis or inhibit cell cycle in LX-2 cells.**

(A) LX-2 cells were treated with PZQ ( $30 \mu\text{g} \cdot \text{ml}^{-1}$ ) for 24 h. The rate of apoptosis was evaluated by flow cytometry. The cells in early apoptosis (Annexin<sup>+</sup>7/AAD<sup>-</sup>) are in the lower right quadrant. (C) Quantification of apoptotic rate in LX-2 cells ( $n = 6$ ). (B) The cell cycle distribution of LX-2 cells was assessed by flow cytometry. (D) Quantification of the cell cycle distribution in LX-2 cells ( $n = 6$ ). All data are presented means  $\pm$  SEM. <sup>ns</sup>  $P > 0.05$ .

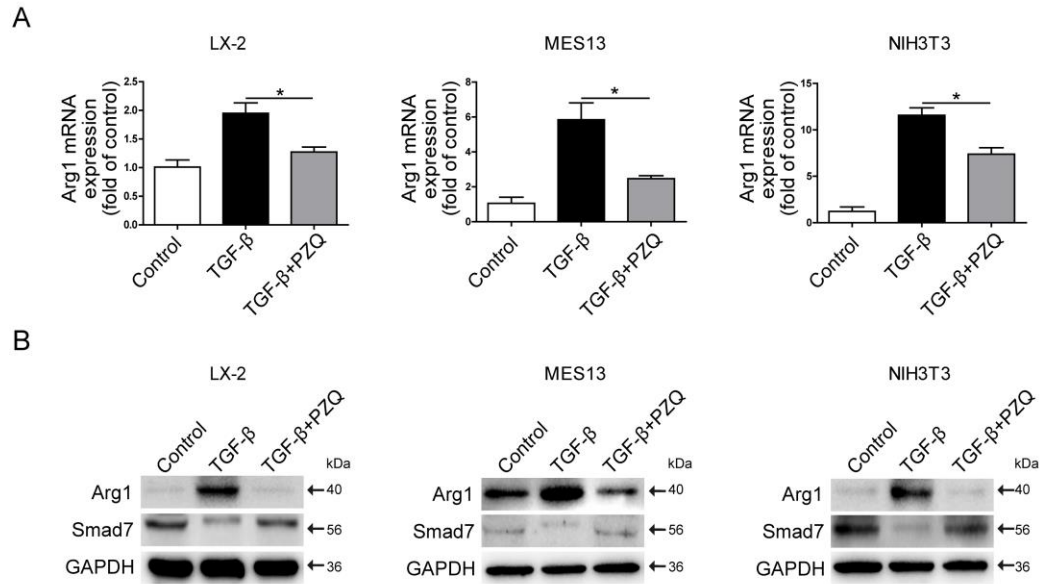

**Figure S5. PZQ inhibits Arg1 expression in fibroblast-like cells or fibroblast.**

(A) qRT-PCR analysis of Arg1 mRNA expression in LX-2, MES13 and NIH3T3 cells. The  $\Delta\Delta C_t$  method was used to quantify relative changes ( $n = 5$ ). (B) Western blot for arginase 1 (Arg1), Smad7 and a loading control (GAPDH) protein levels in LX-2, MES13 and NIH3T3 cells ( $n = 5$ ). All data are presented as means  $\pm$  SEM. \*  $P < 0.05$ .
